# Supplementary material for: Tal2c Activates the Expression of OsF3H04g to Promote Infection as a Redundant TALE of Tal2b in Xanthomonas oryzae pv. oryzicola
Source: MDPI journal article supplement (doi:10.3390/ijms222413628), 2021-12-20
Supplement: s1 [file s1]

## Supplement figures

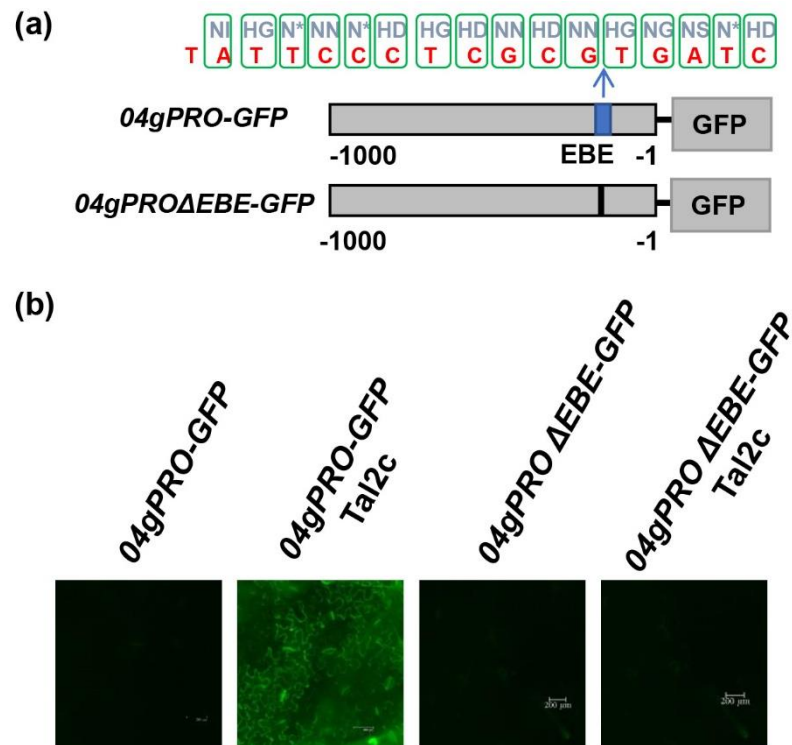

**Figure S1.** Tal2c directly targets the EBE in the promoter of *OsF3H<sub>04g</sub>*. (A) Schematic diagram of the 1000 bp *OsF3H<sub>04g</sub>* promoter and putative TAL effector binding element (EBE)-deleted promoter upstream of the translation initiation site fused with a green fluorescent protein (GFP) reporter. (B) Co-expression of Tal2c and GFP reporter derived under the *OsF3H<sub>04g</sub>* promoter or EBE deletion promoter in *Nicotiana benthamiana*. The *OsF3H<sub>04g</sub>* promoter- or EBE-deleted promoter-derived GFP reporter was individually expressed as a control. GFP fluorescence was scanned by laser confocal microscopy. Scale bars, 100  $\mu$ m.

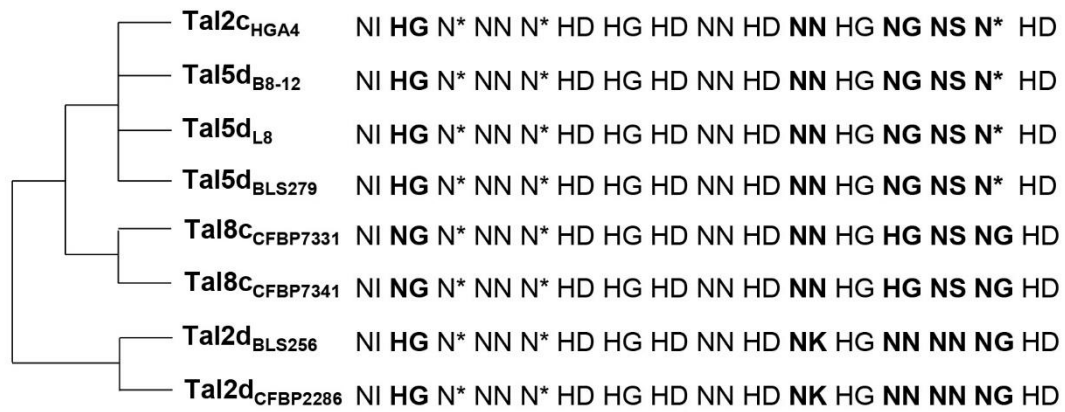

**Figure S2.** Alignment of RVD sequences of Tal2c orthologs from different Xoc strains. The RVD sequences of the Tal2c orthologs from HGA4, B8-12, L8, BLS279, BLS256, CFBP2286, CFBP7331, and CFBP7341 were aligned. The RVDs sequences labeled in dark indicate variations.

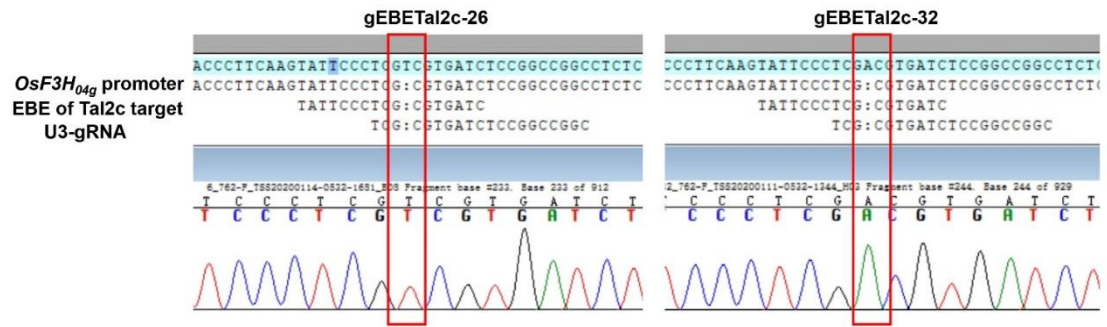

**Figure S3.** The blast of *OsF3H<sub>04g</sub>* promoter sequences of EBE gene editing rice lines.

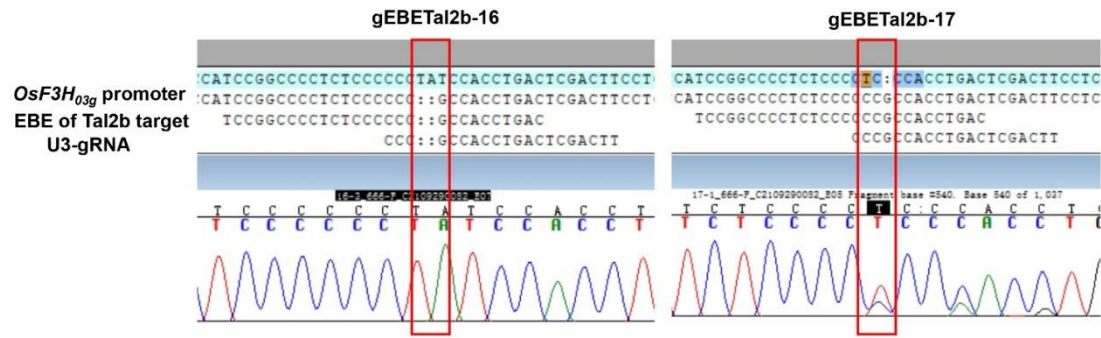

**Figure S4.** The blast of *OsF3H<sub>03g</sub>* promoter sequences of EBE gene editing rice lines.

**Table S3.** The detailed list of primers used in this study.

| Primer name     | Gene       | Forward primer (5'-3')                        | Reverse primer (5'-3')                         | Application                |
|-----------------|------------|-----------------------------------------------|------------------------------------------------|----------------------------|
| Tal2c-F/R       | Tal2c      | atgaagcttGCTCAGTCGGGGGACTATC<br>TGAGCGAC      | atggtcgacTCACTGAGGCAATAGCT<br>CCATCAACCATGCG   | Amplification              |
| Tal2b-F2/R2     | Tal2c      | GGATCCCATTTCGTCCGCGCAGGC                      | TCAAGCGTAATCTGGAACATCGT<br>ATGGGTACTGAGGC      | Amplification              |
| 04gPRO-F/R      | Os04g49194 | GGCTAGTGGTTGTGAGCCCCAAC                       | GGGAGACGAAGCGCGAGGT                            | Amplification              |
| 04gPRO-ΔEBE-F/R | Os04g49194 | AGAGGCCGGCCGAGATCCTTGAA<br>GGGTGAATGCGCTACGCG | CGCGTAGCGCATTCACCCTTCAA<br>GGATCTCCGGCCGGCCTCT | Amplification              |
| F3H04g-OE-F/R   | Os04g49194 | GGCAACGACGCAGTTGCTGTC                         | CTACTGGCCTTTGAAGAGCTCTA<br>GG                  | Amplification              |
| EBETal2c-F/R    | Os04g49194 | ggcaGCCGGCCGAGATCACGCGA                       | aaacTCGCGTGATCTCCGGCCGGC                       | U3-gRNA target             |
| EBETal2b-F/R    | Os03g03034 | ggcaAAGTCGAGTCAGGTGGCGGG                      | aaacCCCGCCACCTGACTCGACTT                       | U3-gRNA target             |
| F3H04g-GD-F/R   | Os04g49194 | AGCATTGGTGATGCCTTTAGG                         | TGTGTACTGTCTCCTTGCGGAC                         | Amplification              |
| F3H03g-GD-F/R   | Os03g03034 | GCTCGATGTGGAGGGAGACTG                         | TGGAGCAGTGATGACTGACTTGC                        | Amplification              |
| HPT-F/R         | ABY65250   | GATCGTTATGTTTATCGGCACTTTG                     | GTACTTCTACACAGCCATCGGTC<br>CA                  | Positive<br>identification |
| OsACTIN-qRT-F/R | Os03g50885 | CAGGCCGTCTCTCTCTGTA                           | ACCGATACTTGGACAG                               | qRT-PCR                    |
| Xoc0105-F/R     | Xoc0105    | CAGTTGCGTGCGTAGTTCAG                          | ACAGCAGTTCGATGCCTACA                           | qRT-PCR                    |
| F3H04g-qRT-F/R  | Os04g49194 | GTCACCAACCACGGGATAGC                          | AGTCTGATTTTCTTGATGGCTC                         | qRT-PCR                    |
| F3H03g-qRT-F/R  | Os03g03034 | GAACGCCCTCACCATCCTC                           | GCTCTGTATCTTCCGTTGCTTAG                        | qRT-PCR                    |
| DR10-qRT-F/R    | Os08g05960 | TCATCAAGCTGATTTATCAGACA                       | CGTACTTGTAGAACGCCATGGA                         | qRT-PCR                    |
| CYL4-qRT-F/R    | Os09g02270 | CCACGTCTTCGACCACTAC                           | CTAGGAACATCGACCAACAA                           | qRT-PCR                    |
| TPS19-qRT-F/R   | Os04g27190 | GAGTGCTATATCAATGAGCAC                         | ACAGATTCCCAACATTTC                             | qRT-PCR                    |
| HSP18.0-qRT-F/R | Os03g16030 | GGTGGAGAGCTTCGATTCGA                          | GGACCAGATTGACGCTTTTATTT                        | qRT-PCR                    |
| CPS4-qRT-F/R    | Os04g09900 | CCCCACCTCCACTACCAATTC                         | AAACCCCGTCTCAGGAAAAAC                          | qRT-PCR                    |
| bHLH6-qRT-F/R   | Os04g23550 | ATTTTTCGACACCCCACTA                           | GCTGGACCACCTTATTATTCATC                        | qRT-PCR                    |
